# Supplementary material for: Ethanol synthesis via catalytic CO2 hydrogenation over multi-elemental KFeCuZn/ZrO2 catalyst
Source: Royal Society of Chemistry journal article supplement (doi:10.1039/d4sc02588a), 2024-01-01
Supplement: d4sc02588a1.pdf [file d4sc02588a1.pdf]

Electronic supplementary information (ESI)

## Ethanol Synthesis via Catalytic CO<sub>2</sub> Hydrogenation over Multi-Elemental KFeCuZn/ZrO<sub>2</sub> Catalysts

Pengfei Du<sup>a</sup>, Abdellah Ait El Fakir<sup>a\*</sup>, Shirun Zhao,<sup>a</sup> Nazmul Hasan MD Dostagir,<sup>a</sup> HongLi Pan,<sup>a</sup> Kah Wei Ting,<sup>a</sup>  
Shinya Mine,<sup>b</sup> Yucheng Qian<sup>a</sup>, Ken-ichi Shimizu,<sup>a\*</sup> Takashi Toyao<sup>a\*</sup>

<sup>a</sup> Institute for Catalysis, Hokkaido University, N-21, W-10, Sapporo 001-0021, Japan

<sup>b</sup> National Institute of Advanced Industrial Science and Technology (AIST), Research Institute for Chemical Process  
Technology, 4-2-1 Nigatake, Miyagino, Sendai 983-8551, Japan

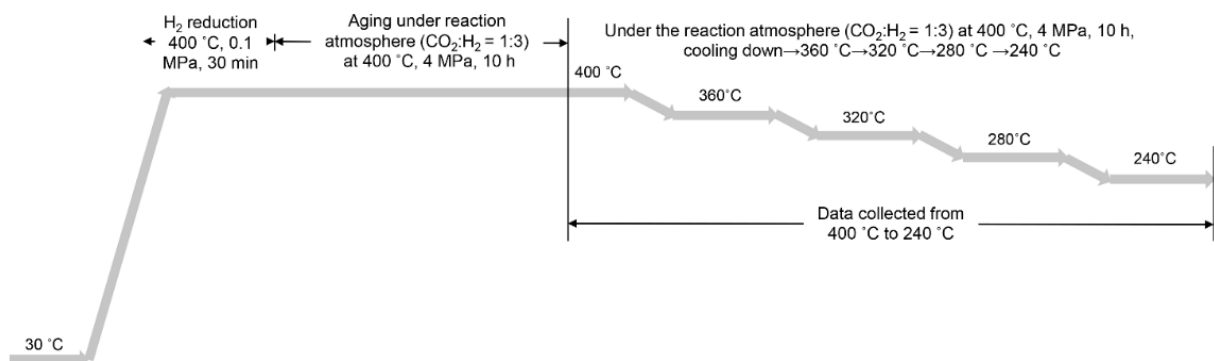

**Figure S1.** Typical experimental procedure for catalytic tests. After conducting H<sub>2</sub> reduction pre-treatment at 400 °C, accelerated aging treatment was performed at 400 °C in the reaction gas atmosphere. The catalytic performance at temperatures ranging from 400 °C to 240 °C was then recorded.

**Table S1.** Catalytic performances for CO<sub>2</sub> hydrogenation to form ethanol in this work and literature.

| Catalyst                                                                                                | T<br>(°C) | P<br>(MPa) | WHSV<br>(L g <sub>cat</sub> <sup>-1</sup> h <sup>-1</sup> ) | CO <sub>2</sub><br>Conversion<br>(%) | CO<br>selectivity<br>(%) | EtOH<br>selectivity<br>(%) | STY <sub>EtOH</sub><br>(mmol g <sub>cat</sub> <sup>-1</sup> h <sup>-1</sup> ) | References |
|---------------------------------------------------------------------------------------------------------|-----------|------------|-------------------------------------------------------------|--------------------------------------|--------------------------|----------------------------|-------------------------------------------------------------------------------|------------|
| KFeCuZn/ZrO <sub>2</sub> *                                                                              | 320       | 4          | 12                                                          | 39.1                                 | 17.8                     | 14.6                       | 3.5                                                                           | This work  |
| KFeCuZn/ZrO <sub>2</sub> *                                                                              | 360       | 4          | 12                                                          | 52.5                                 | 9.6                      | 16.5                       | 5.4                                                                           | This work  |
| Na-Co/SiO <sub>2</sub>                                                                                  | 250       | 5          | 6                                                           | 21                                   | 27                       | 6                          | 0.5                                                                           | 1          |
| Cs-Cu <sub>0.8</sub> Fe <sub>1.0</sub> Zn <sub>1.0</sub>                                                | 330       | 5          | 4.5                                                         | 35                                   | 20                       | 12                         | 1.1                                                                           | 2          |
| Na-ZnFe@C                                                                                               | 320       | 5          | 9                                                           | 38.4                                 | 7.6                      | 20.3                       | 3.4                                                                           | 3          |
| K/Cu-Zn-Fe                                                                                              | 300       | 7          | 5                                                           | 44.2                                 | 5.9                      | 19.5                       | 2.3                                                                           | 4          |
| K-In/Ce-ZrO <sub>2</sub>                                                                                | 300       | 10         | 4.5                                                         | 19                                   | 57                       | 5 (C <sub>2+</sub> )       | 0.4 (C <sub>2+</sub> )                                                        | 5          |
| 2K <sub>2</sub> OFe <sub>5</sub> Rh/SiO <sub>2</sub>                                                    | 250       | 7.5        | 7                                                           | 18                                   | 5                        | 16                         | 0.4                                                                           | 6          |
| 4.6K/CuMnZnFe                                                                                           | 320       | 5          | 6                                                           | 30.4                                 | 30.6                     | ~7                         | 1.7                                                                           | 7          |
| RhFeLi/TiO <sub>2</sub>                                                                                 | 250       | 3          | 6000 h <sup>-1</sup>                                        | 15.7                                 | 12.5                     | 35.8                       | ~1.3 (mmol ·<br>L <sub>cat</sub> <sup>-1</sup> · h <sup>-1</sup> )            | 8          |
| Co/La <sub>4</sub> Ga <sub>2</sub> O <sub>9</sub>                                                       | 280       | 3          | 3                                                           | 9.6                                  | 10.8                     | 23.3                       | 0.2                                                                           | 9          |
| Pd/Fe <sub>3</sub> O <sub>4</sub>                                                                       | 300       | 0.1        | 60                                                          | 0.3                                  | 0                        | 97.5                       | 0.4                                                                           | 10         |
| Pd/CeO <sub>2</sub>                                                                                     | 240       | 3          | 3                                                           | 9.2                                  |                          | 99.2                       | 1.2                                                                           | 11         |
| Na-Rh@S-1                                                                                               | 250       | 5          | 6                                                           | 10                                   | 32                       | 16                         | 0.6                                                                           | 12         |
| 2%Na-Fe@C/5%KCuZnAl                                                                                     | 320       | 5          | 4.5                                                         | 39.2                                 | 9.4                      | 35                         | 3.6                                                                           | 13         |
| Li-Rh/SiO <sub>2</sub>                                                                                  | 240       | 5          | 6                                                           | 7                                    | 15.7                     | 18.4                       | 0.4                                                                           | 14         |
| Mo <sub>1</sub> Co <sub>1</sub> K <sub>0.6</sub>                                                        | 320       | 5          | 3                                                           | 23.5                                 | 77.2                     | 8.9                        | 0.1                                                                           | 15         |
| K-CuMgZnFe/CZA                                                                                          | 320       | 5          | 6                                                           | 42.3                                 | 13.8                     | ~17.4 (C <sub>2+</sub> )   | ~2.4 (C <sub>2+</sub> )                                                       | 16         |
| FeNaS-0.6                                                                                               | 320       | 3          | 8                                                           | 32.0                                 | 20.7                     | 15.9 (C <sub>2+</sub> )    | 1.7 (C <sub>2+</sub> )                                                        | 17         |
| Cu/CeO <sub>2</sub>                                                                                     | 190       | 0.1        | 9                                                           | ~0.1                                 | ~3                       | 84                         | 0.02                                                                          | 18         |
| Pd <sub>2</sub> Ce@Si                                                                                   | 240       | 3          | 3                                                           | 6                                    | ~2                       | 94                         | 0.8                                                                           | 19         |
| Co <sub>2</sub> C-CuZnAl                                                                                | 250       | 5          | 12                                                          | 21                                   | 12.5                     | ~18.9                      | ~2.2                                                                          | 20         |
| PdFe-6.9(37nm)                                                                                          | 320       | 5          | 6                                                           | 35.6                                 | 20.7                     | 18.2 (C <sub>2+</sub> )    | ~1.9 (C <sub>2+</sub> )                                                       | 21         |
| CuZnFe <sub>0.5</sub> K <sub>0.15</sub>                                                                 | 300       | 6          | 5000 h <sup>-1</sup>                                        | 42.3                                 | 49.2                     | 36.7 (C <sub>2+</sub> )    | 3.4 (C <sub>2+</sub> )                                                        | 22         |
| Cu/Co <sub>3</sub> O <sub>4</sub> -2h                                                                   | 250       | 3          | 36                                                          | 13.9                                 | 6.5                      | 15.2                       | 1.9                                                                           | 23         |
| Rh-VO <sub>x</sub> /MCM-4                                                                               | 250       | 3          | 6000 h <sup>-1</sup>                                        | 12.1                                 | 20.1                     | 24.1                       | 1.1                                                                           | 24         |
| Cu@Na-Beta                                                                                              | 300       | 1.3        | 12                                                          | 7.9                                  | 30.5                     | 69.5                       | 3.4                                                                           | 25         |
| 90Fe10Co (1.0)K                                                                                         | 240       | 1.2        | 1.5                                                         | 14.5                                 | 45.5                     | 10.8                       | 0.07                                                                          | 26         |
| Cu <sub>25</sub> Fe <sub>22</sub> Co <sub>3</sub> K <sub>3</sub> -CuZn <sub>1.0</sub> K <sub>0.15</sub> | 350       | 6          | 5000 h <sup>-1</sup>                                        | 32.4                                 | 45.3                     | < 12                       | < 0.6 (mmol ·<br>L <sub>cat</sub> <sup>-1</sup> · h <sup>-1</sup> )           | 27         |
| CoMoS                                                                                                   | 340       | 10.4       | 0.43                                                        | 32                                   | 57.5                     | 12.9                       | 0.07                                                                          | 28         |
| Na-CuCo-9                                                                                               | 330       | 4          | 5                                                           | 20.1                                 | 26.5                     | 18.0                       | ~2.3                                                                          | 29         |
| K-CuZnAl/Zr <sub>(0.03)</sub> -CuFe                                                                     | 320       | 4          | 24                                                          | 28.8                                 | ~13.4                    | 19.7 (C <sub>2+</sub> )    | 3.8 (C <sub>2+</sub> )                                                        | 30         |
| Rh-Fe/TiO <sub>2</sub>                                                                                  | 270       | 2          | 8                                                           | 9.2                                  | 28.4                     | 6.4                        | 0.6                                                                           | 31         |
| Rh-Fe/SiO <sub>2</sub>                                                                                  | 260       | 5          | 6                                                           | 16.7                                 | 19.7                     | 16                         | 1.4                                                                           | 32         |
| IrMo-SiO <sub>2</sub>                                                                                   | 200       | 4.9        | 2000 h <sup>-1</sup>                                        | 7                                    | 41.7                     | 4.3                        | 0.04                                                                          | 33         |
| Rh/CeO <sub>2</sub> -SiO <sub>2</sub>                                                                   | 240       | 5          | 3                                                           | 8.3                                  | 33.5                     | 6.1 (C <sub>2+</sub> )     | 0.2 (C <sub>2+</sub> )                                                        | 34         |
| RhLi/Y                                                                                                  | 250       | 3          | 6                                                           | 13.1                                 | 86.6                     | 2.7(C <sub>2+</sub> )      | 0.8 (C <sub>2+</sub> )                                                        | 35         |
| α-CoMoO <sub>4</sub> /K                                                                                 | 250       | 3          | 1.2                                                         | 7.2                                  | 27.8                     | 4.8 (C <sub>2+</sub> )     | 0.2 (C <sub>2+</sub> )                                                        | 36         |
| β-MoC <sub>y</sub>                                                                                      | 200       | 2          | 9                                                           | 6                                    | 39                       | 3 (C <sub>2+</sub> )       | 0.1 (C <sub>2+</sub> )                                                        | 37         |
| Pt/Co <sub>3</sub> O <sub>4</sub>                                                                       | 200       | 2          | 3                                                           | 27                                   | 0                        | 4.2 (C <sub>2+</sub> )     | 0.3 (C <sub>2+</sub> )                                                        | 38         |
| In <sub>2</sub> O <sub>3</sub> -Fe <sub>2</sub> O <sub>3</sub> -<br>K-Al <sub>2</sub> O <sub>3</sub>    | 300       | 2          | 4                                                           | 36                                   | ~40                      | 42 (C <sub>2+</sub> )      | 3.02 (C <sub>2+</sub> )                                                       | 39         |
| 3KCuFeZn/CuZnAlZr                                                                                       | 300       | 5          | 3                                                           | 27                                   | 28                       | 24.6 (C <sub>2+</sub> )    | 0.9 (C <sub>2+</sub> )                                                        | 40         |

\*For the efficient evaluation of catalyst durability, accelerated aging treatment at 400 °C for 10 h was performed before the reaction.

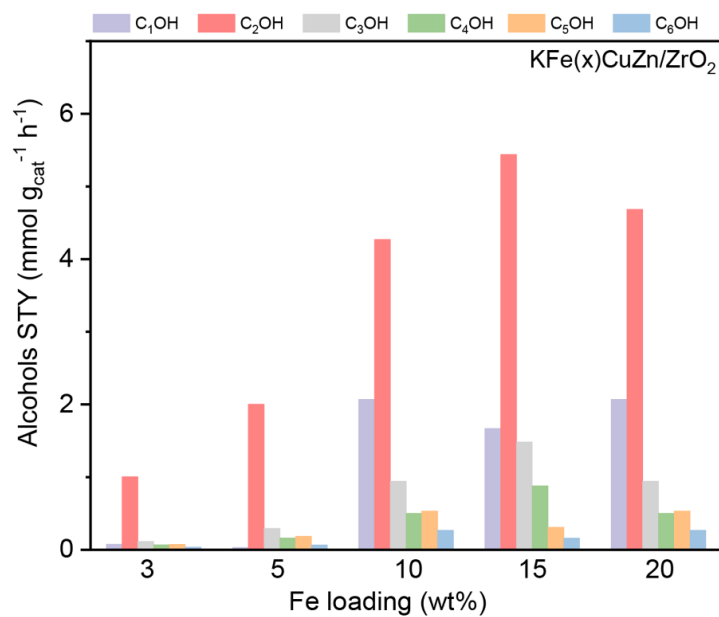

**Figure S2.** Alcohols STY distribution over the catalysts with different Fe loading at 360 °C. Conditions: 0.2 g catalyst, H<sub>2</sub>: CO<sub>2</sub> = 3:1, and internal standard gas: Ar (0.8 vol%), 4 MPa, and 12 L g<sub>cat</sub><sup>-1</sup> h<sup>-1</sup>.

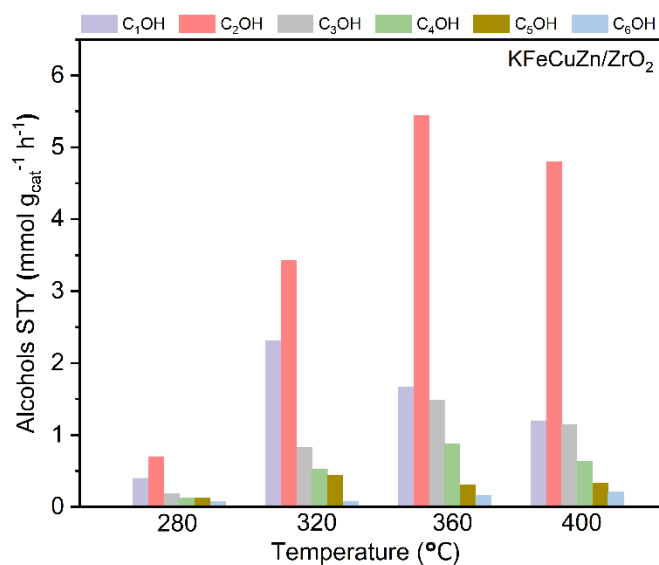

**Figure S3.** Alcohols STY distribution at 280–400 °C. Conditions: 0.2 g catalyst, H<sub>2</sub>: CO<sub>2</sub> = 3:1, and internal standard gas: Ar (0.8 vol%), 4 MPa, and 12 L g<sub>cat</sub><sup>-1</sup> h<sup>-1</sup>.

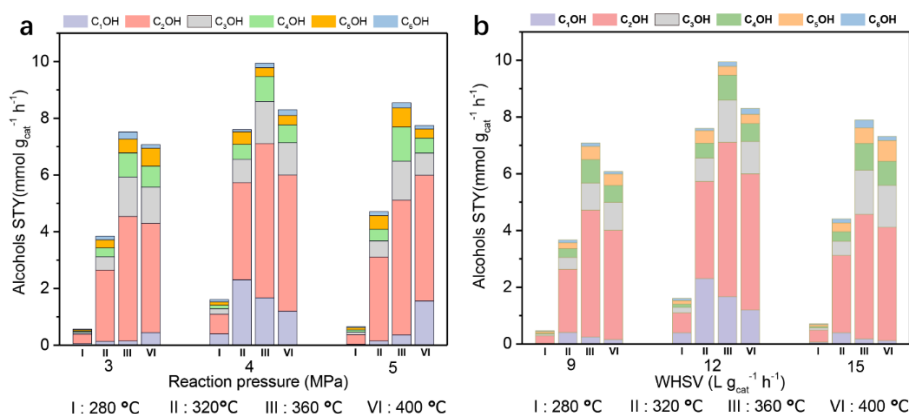

**Figure S4.** Influence of pressure (a) and gas hourly space velocity (GHSV, b) on alcohols STY at 280-400 °C. Conditions: 0.2 g catalyst,  $H_2:CO_2 = 3:1$ , and internal standard gas : Ar (0.8 vol%), 3-5 MPa, and 9-15  $L g_{cat}^{-1} h^{-1}$ .

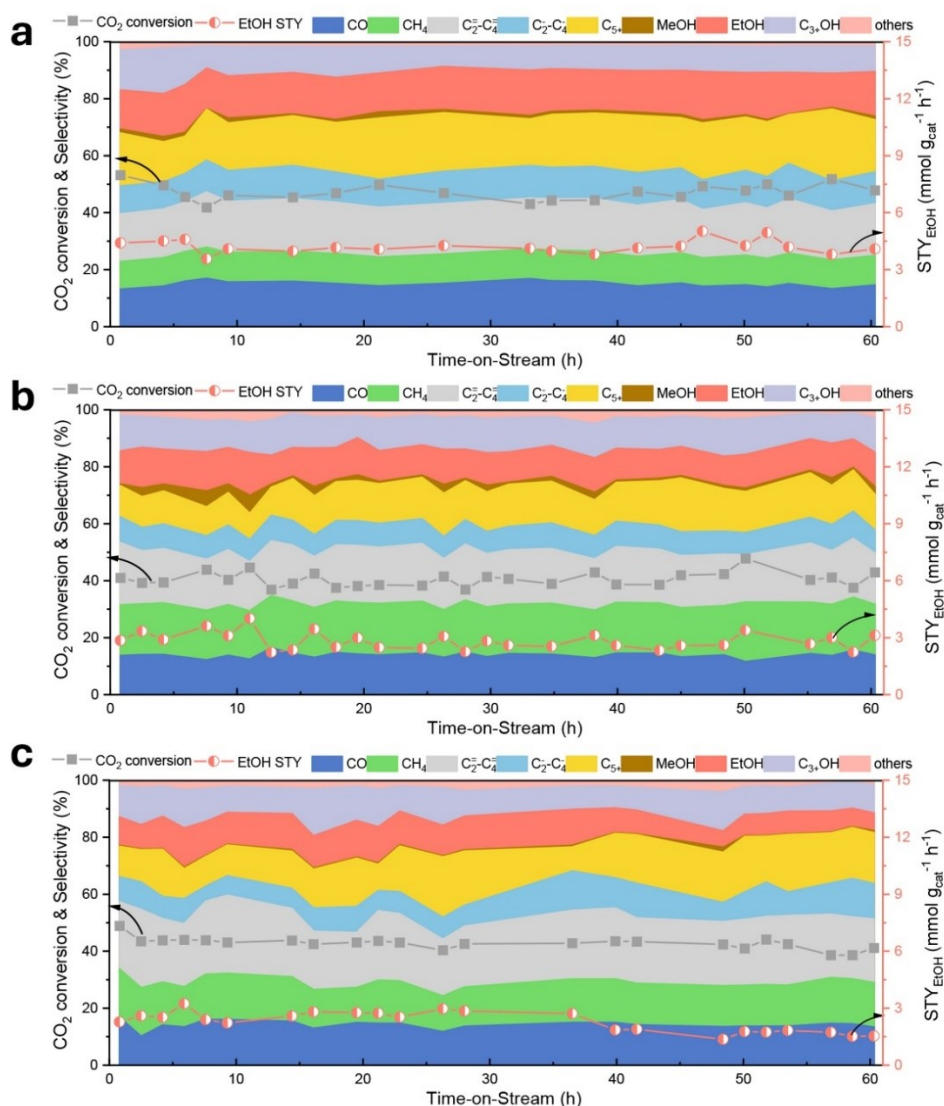

**Figure S5.** Stability test for KFeCu/ZrO<sub>2</sub>, KFeZn/ZrO<sub>2</sub> and KFe/ZrO<sub>2</sub> at 360 °C. Pretreatment condition: 400 °C, 0.1 MPa, H<sub>2</sub>/Ar (99/1%), and 0.5 h. Reaction condition: 12  $L g_{cat}^{-1} h^{-1}$ , 4.0 MPa, and H<sub>2</sub>/CO<sub>2</sub>/Ar (74.4/24.8/0.8%). Ar was used as an internal standard gas. Accelerated aging treatment was performed before reaction at 400 °C for 10 h under the reaction environment. Others include acetaldehyde and ethyl formate. In Figure S5, the gray dots are CO<sub>2</sub> conversion; red dot is EtOH STY.

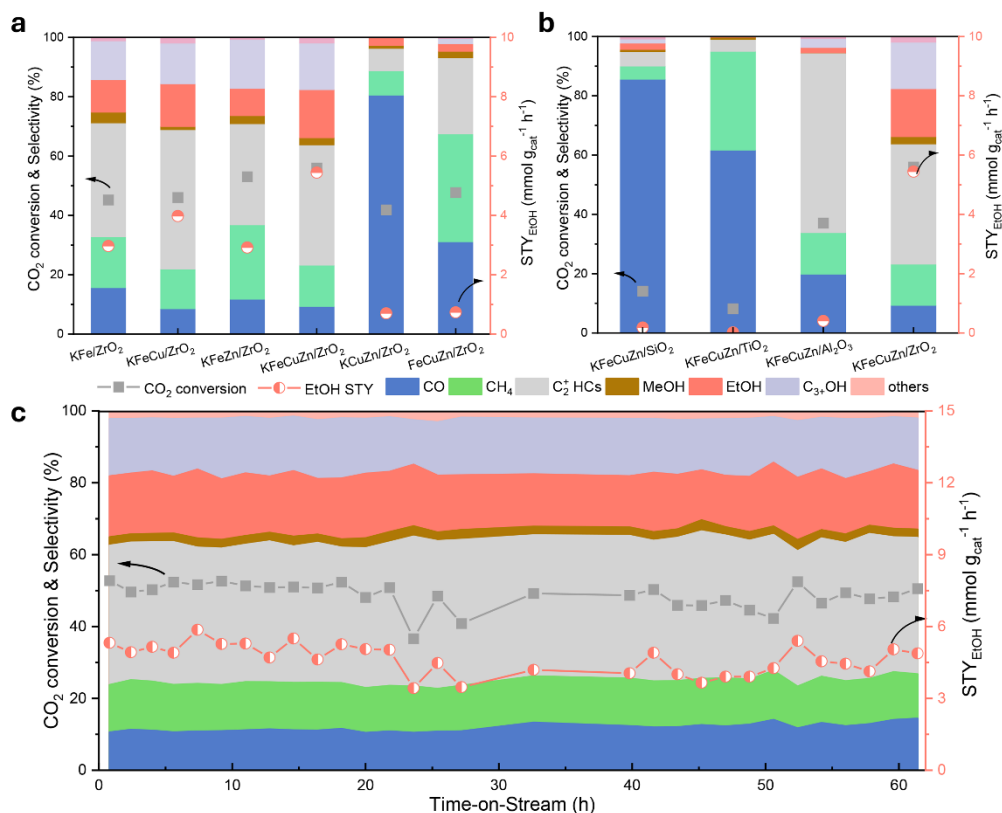

**Figure S6.** Simplified exhibition for catalytic performance. (a) CO<sub>2</sub> conversion and product selectivity at 360 °C and STY<sub>EtOH</sub> over KFe/ZrO<sub>2</sub> based catalysts; (b) CO<sub>2</sub> conversion, product selectivity, and STY<sub>EtOH</sub> over different supporting; and (c) stability test for KFeCuZn/ZrO<sub>2</sub> at 360 °C. Pretreatment condition: 400 °C, 0.1 MPa, H<sub>2</sub> (99%), and 0.5 h. Reaction condition: 12 L g<sub>cat</sub><sup>-1</sup> h<sup>-1</sup>, 4.0 MPa, and H<sub>2</sub>/CO<sub>2</sub>/Ar (74.4/24.8/0.8%). Ar was used as an internal standard gas. The data was collected after 3 h, when the temperature and reaction were stable. Accelerated aging treatment was performed before reaction at 400 °C for 10 h under the reaction environment. HCs: hydrocarbons; Others include acetaldehyde and ethyl formate. In Figure S6 a and b, the grey dot is CO<sub>2</sub> conversion; red dot is EtOH STY.

**Table S2.** Specific surface areas and pore volumes of studied KFe-based catalysts.

| Samples                  | BET specific surface area (m <sup>2</sup> /g) | Pore volume (cm <sup>3</sup> /g) |
|--------------------------|-----------------------------------------------|----------------------------------|
| KFe/ZrO <sub>2</sub>     | 60.4                                          | 0.059                            |
| KFeCu/ZrO <sub>2</sub>   | 54.8                                          | 0.051                            |
| KFeZn/ZrO <sub>2</sub>   | 41.4                                          | 0.039                            |
| KFeCuZn/ZrO <sub>2</sub> | 40.6                                          | 0.036                            |

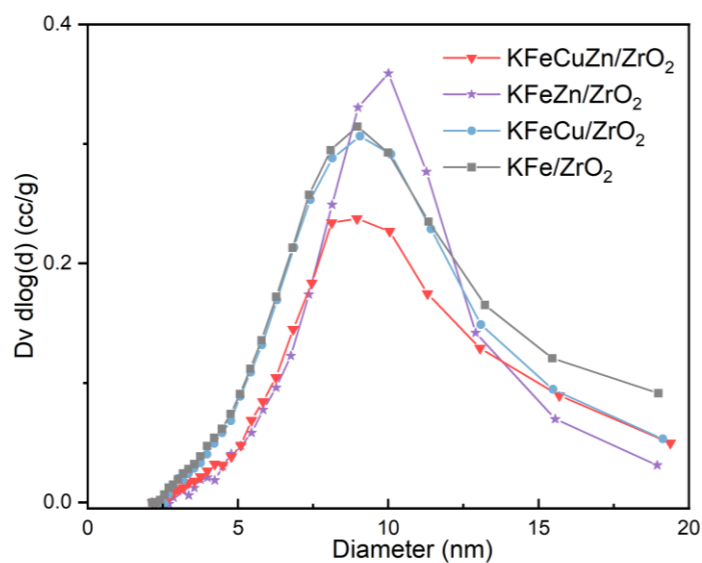

**Figure S7.** Pore size distribution curve of the studied samples calculated from desorption branch of the isotherm by the BJH method.

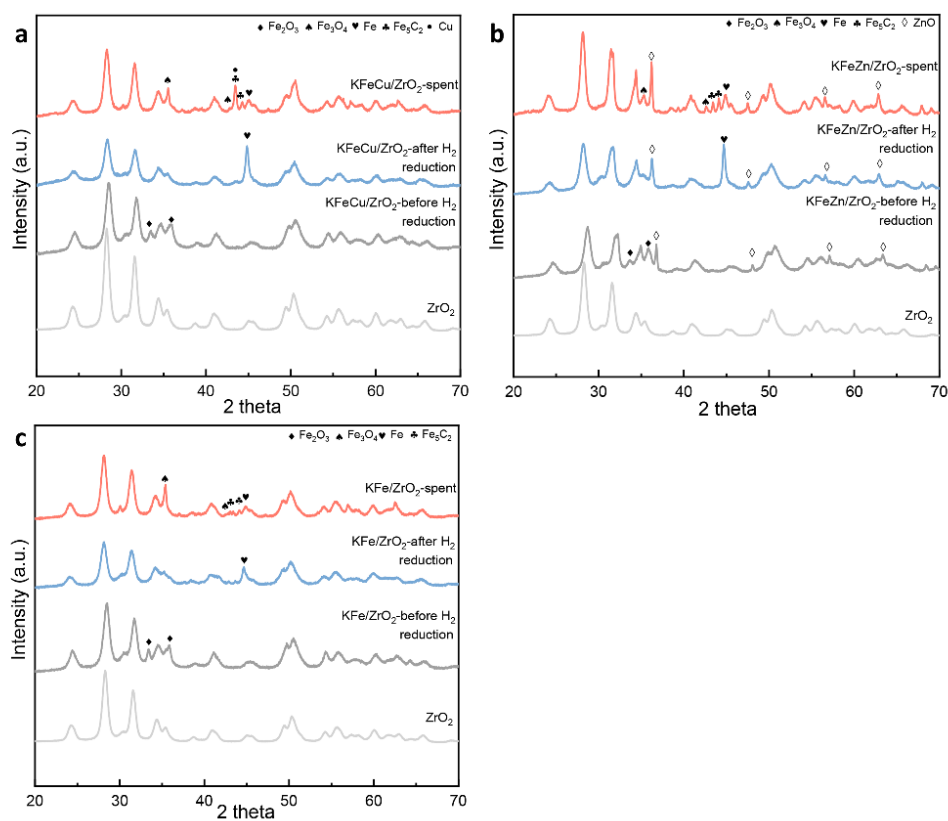

**Figure S8.** XRD patterns for (a) KFe/CuZrO<sub>2</sub>; (b) KFeZn/ZrO<sub>2</sub>; (c) KFe/ZrO<sub>2</sub> before and after H<sub>2</sub> reduction, as well as after reaction. “Spent catalyst” refers to a sample that has undergone a 20-hour accelerated aging treatment at 400 °C under the reaction condition.

**Table S3.** Curve-fitting results of the *ex situ* Fe K-edge FT-EXAFS spectra of the KFeCuZn/ZrO<sub>2</sub> catalyst.

| Sample                                                    | shell   | CN      | R (Å)     | $\sigma^2$ (Å <sup>2</sup> ) | $\Delta E$ | R factor |
|-----------------------------------------------------------|---------|---------|-----------|------------------------------|------------|----------|
| KFeCuZn/ZrO <sub>2</sub> -before H <sub>2</sub> reduction | Fe–O    | 4.4±0.7 | 1.99±0.01 | 0.007                        | 2.43       | 0.014    |
|                                                           | Fe–O–Fe | 4.6±0.9 | 2.98±0.01 | 0.008                        |            |          |
| KFeCuZn/ZrO <sub>2</sub> - after H <sub>2</sub> reduction | Fe–Fe   | 5.8±2.1 | 2.45±0.02 | 0.005                        | 0.85       | 0.008    |
|                                                           | Fe–Fe   | 4.8±2.2 | 2.83±0.01 | 0.005                        |            |          |
| KFeCuZn/ZrO <sub>2</sub> -spent                           | Fe–O(C) | 3       | 1.99±0.02 | 0.003                        | 8          | 0.017    |
|                                                           | Fe–C(O) | 2.7±1.1 | 1.87±0.01 | 0.003                        |            |          |
|                                                           | Fe–C–Fe | 3.9±0.3 | 2.58±0.01 | 0.01                         |            |          |
|                                                           | Fe–C–Fe | 1.1±0.6 | 2.40±0.02 | 0.008                        |            |          |
|                                                           | Fe–O–Fe | 5.6±1.2 | 3.42±0.01 | 0.01                         |            |          |

CN: coordination numbers; R: bond distance;  $\sigma^2$ : Debye-Waller factors; R factor: goodness of fit.  $S_0^2$  was set to 0.8, according to the EXAFS fit of Fe foil.

**Table S4.** Curve-fitting results of the *ex situ* Cu K-edge FT-EXAFS spectra of the KFeCuZn/ZrO<sub>2</sub> catalyst.

| Sample                                                     | shell   | CN       | R (Å)      | $\sigma^2$ (Å <sup>2</sup> ) | $\Delta E$ | R factor |
|------------------------------------------------------------|---------|----------|------------|------------------------------|------------|----------|
| KFeCuZn/ZrO <sub>2</sub> - before H <sub>2</sub> reduction | Cu–O    | 3.9±0.5  | 1.93±0.005 | 0.005                        | 5.2        | 0.019    |
|                                                            | Cu–O–Cu | 2.0±0.4  | 2.91±0.013 | 0.008                        |            |          |
| KFeCuZn/ZrO <sub>2</sub> - after H <sub>2</sub> reduction  | Cu–Cu   | 8.9±1.2  | 2.54±0.004 | 0.009                        | 4.42       | 0.014    |
| KFeCuZn/ZrO <sub>2</sub> -spent                            | Cu–Cu   | 10.4±1.1 | 2.54±0.007 | 0.009                        | 4.57       | 0.014    |

CN: coordination numbers; R: bond distance;  $\sigma^2$ : Debye-Waller factors; R factor: goodness of fit.  $S_0^2$  was set to 0.87, according to the EXAFS fit of Cu foil.

**Table S5.** Curve-fitting results of the *ex situ* Zn K-edge FT-EXAFS spectra of the KFeCuZn/ZrO<sub>2</sub> catalyst.

| Sample                                                     | shell   | CN       | R (Å)      | $\sigma^2$ (Å <sup>2</sup> ) | $\Delta E$ | R factor |
|------------------------------------------------------------|---------|----------|------------|------------------------------|------------|----------|
| KFeCuZn/ZrO <sub>2</sub> - before H <sub>2</sub> reduction | Zn–O    | 3.2±0.01 | 1.95±0.005 | 0.005                        | 1.6        | 0.018    |
|                                                            | Zn–O–Zn | 8.3±0.01 | 3.22±0.013 | 0.010                        |            |          |
| KFeCuZn/ZrO <sub>2</sub> - after H <sub>2</sub> reduction  | Zn–O    | 2.8±0.8  | 3.22±0.02  | 0.004                        | 1.2        | 0.04     |
|                                                            | Zn–Zn   | 1.2±0.8  | 2.58±0.05  | 0.01                         |            |          |
| KFeCuZn/ZrO <sub>2</sub> -spent                            | Zn–O–Zn | 11±1.5   | 3.22±0.02  | 0.01                         | 1.6        | 0.03     |
|                                                            | Zn–O    | 3.1±0.6  | 3.22±0.01  | 0.004                        |            |          |
|                                                            | Zn–O–Zn | 10.8±1.1 | 3.22±0.01  | 0.01                         |            |          |

CN: coordination numbers; R: bond distance;  $\sigma^2$ : Debye-Waller factors; R factor: goodness of fit.  $S_0^2$  was set to 0.96, according to the EXAFS fit of Zn foil.



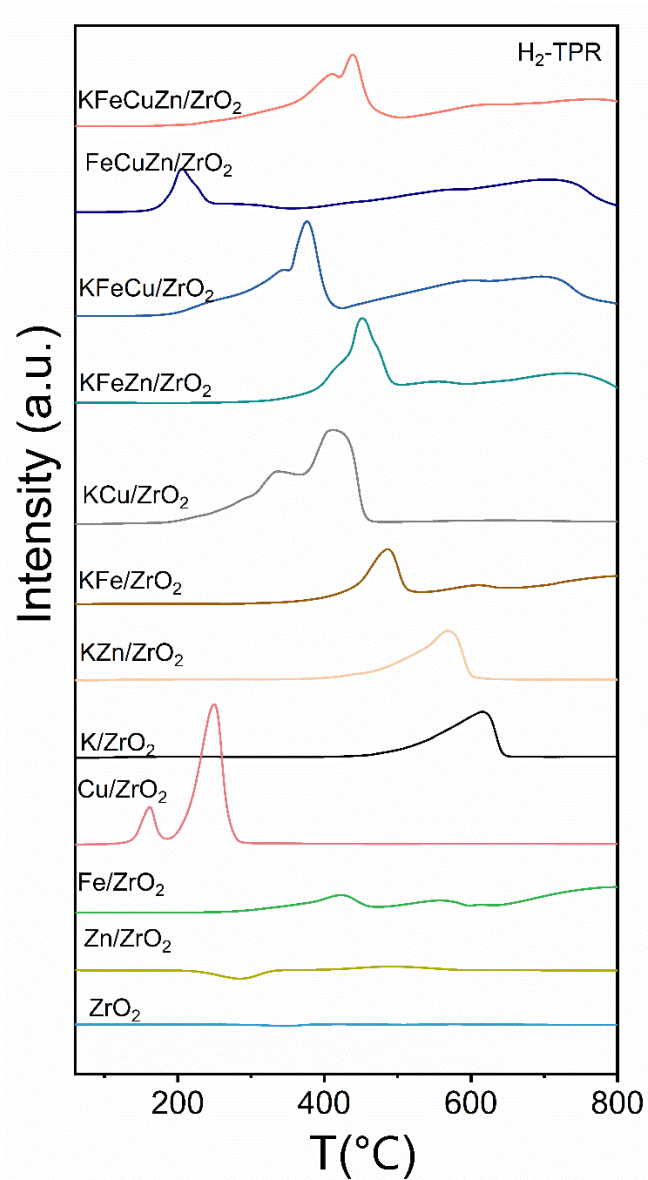

**Figure S9.** H<sub>2</sub>-TPR results over different control catalysts. Condition: Ar pretreatment at 200 °C for 1hr, heating in 10% H<sub>2</sub>/Ar from 50 to 800 °C.

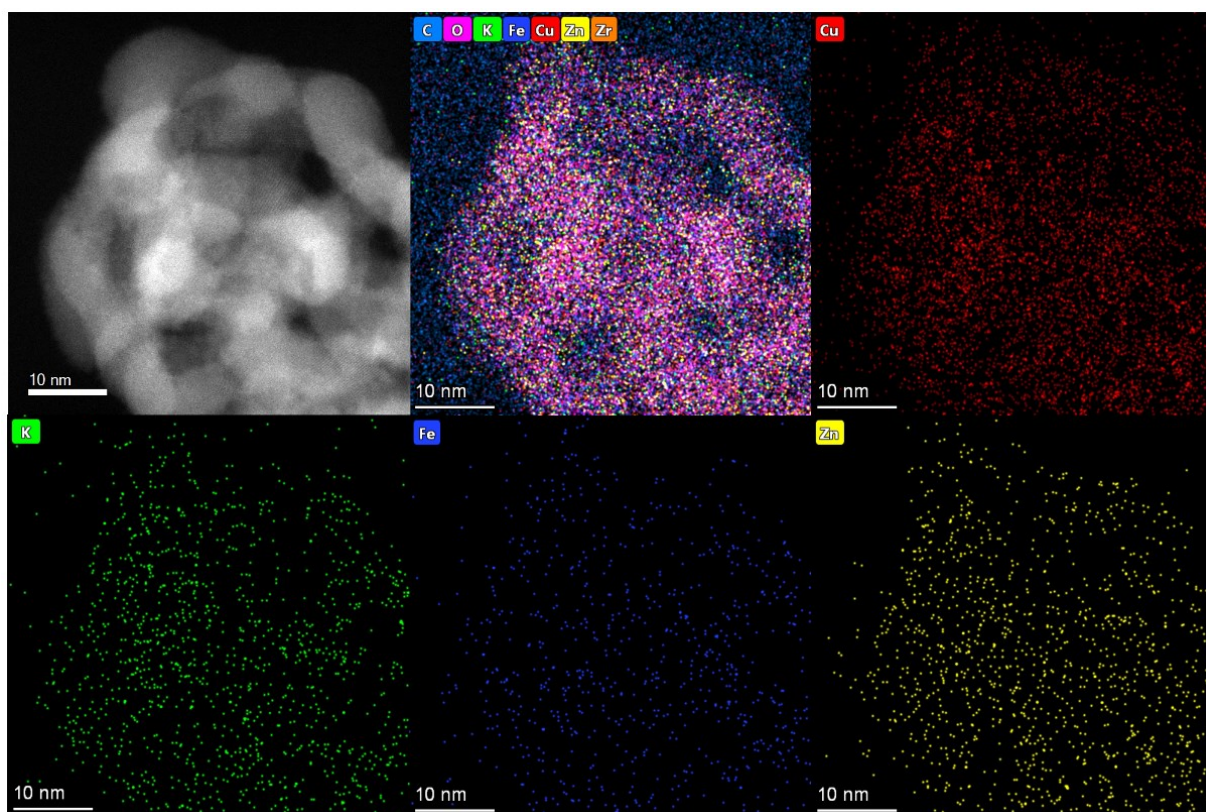

**Figure S10.** HAADF-STEM image and corresponding EDS mapping images of the fresh KFeCuZn/ZrO<sub>2</sub> that has undergone H<sub>2</sub> reduction pretreatment at 400 °C.

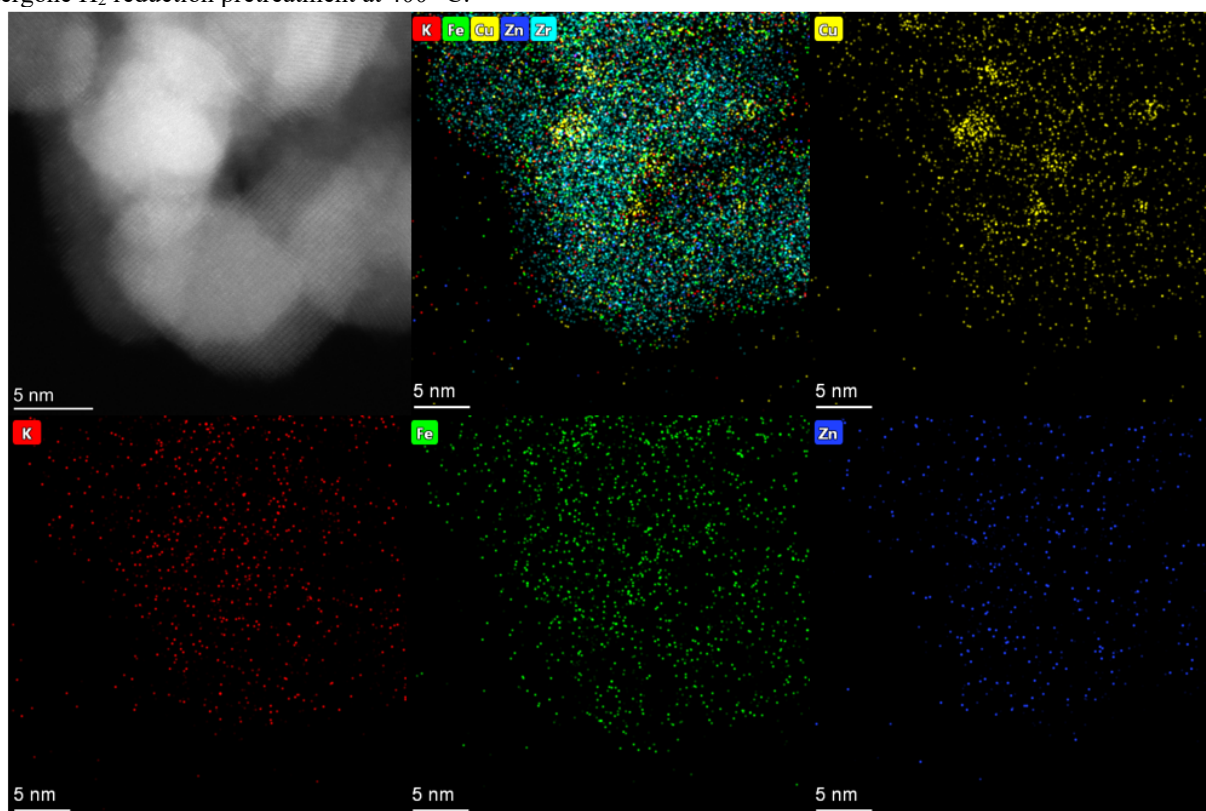

**Figure S11.** HAADF-STEM image and corresponding EDS mapping images of the spent KFeCuZn/ZrO<sub>2</sub> that has undergone a 20-hour accelerated aging treatment at 400 °C under the reaction condition.

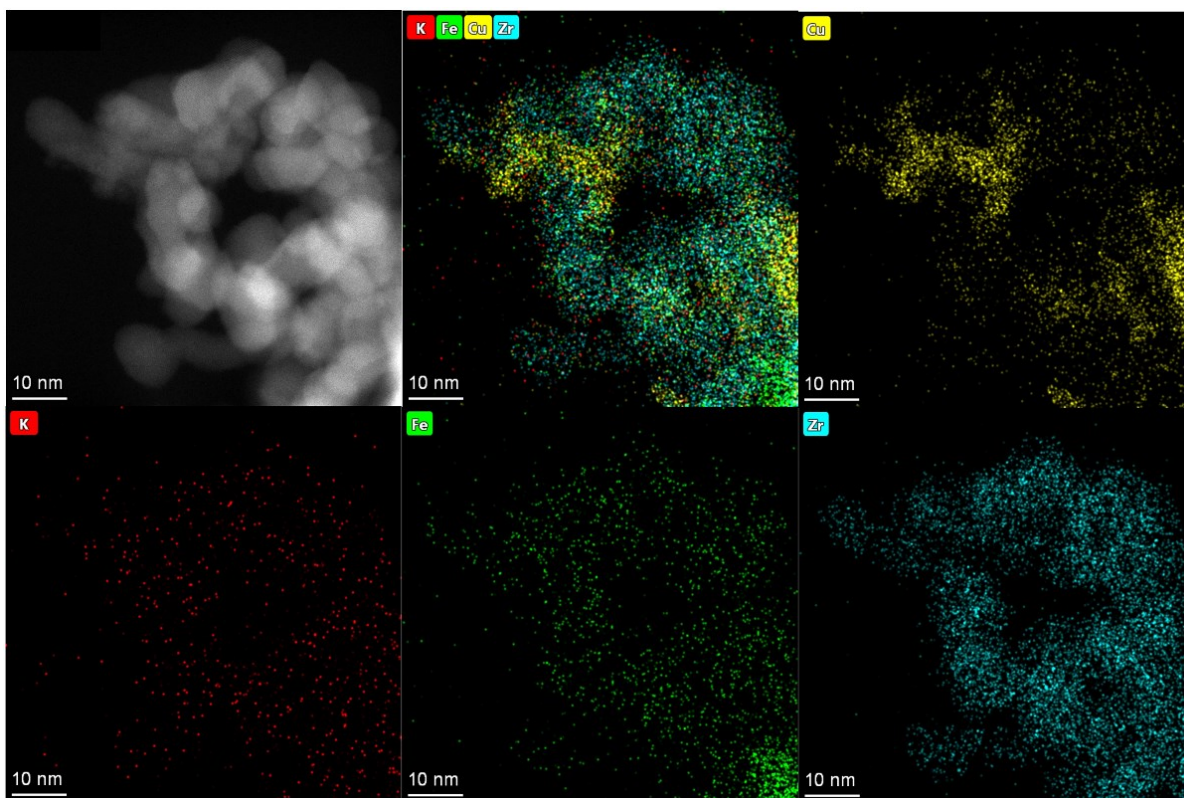

**Figure S12.** HAADF-STEM image and corresponding EDS mapping images of the spent KFeCu/ZrO<sub>2</sub> that has undergone a 20-hour accelerated aging treatment at 400 °C under the reaction condition.

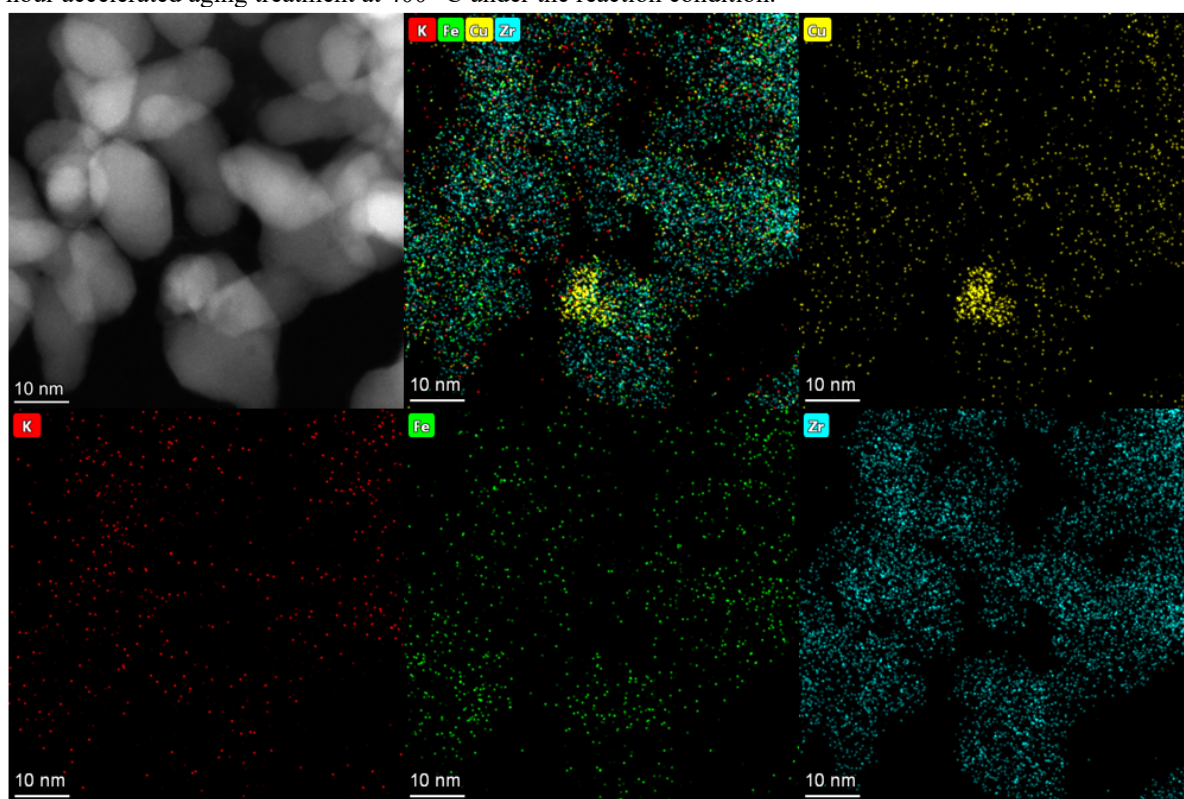

**Figure S13.** HAADF-STEM image and corresponding EDS mapping images of the spent KFeCu/ZrO<sub>2</sub> that has undergone a 20-hour accelerated aging treatment at 400 °C under the reaction condition.

**Table S6.** DRIFTS peak assignments of the surface species for CO<sub>2</sub> hydrogenation.

| Surface species                    | Wavenumber (cm <sup>-1</sup> )  | References |
|------------------------------------|---------------------------------|------------|
| *CO <sub>3</sub>                   | 1227–1281                       | 2          |
| *HCO <sub>3</sub>                  | 1620-1640                       | 41         |
| *CH <sub>3</sub> O                 | 2826, 1070, 2940, 2841-2866     | 42         |
| *HCOO                              | 2676–2774, 1593–1610, 1337–1397 | 2,43       |
| *CH <sub>3</sub> CH <sub>2</sub> O | 2856, 2928, 2963, 1458,1095     | 25,44      |
| *CH <sub>3</sub> CHO               | 1415, 1340, 1720                | 2,44       |
| CH <sub>4</sub>                    | 3016                            | 2          |
| CO (gas)                           | 2110, 2179                      | 44         |
| Linear–CO                          | 2060–2098                       | 44         |
| Bridging–CO                        | 1900–1940                       | 44         |

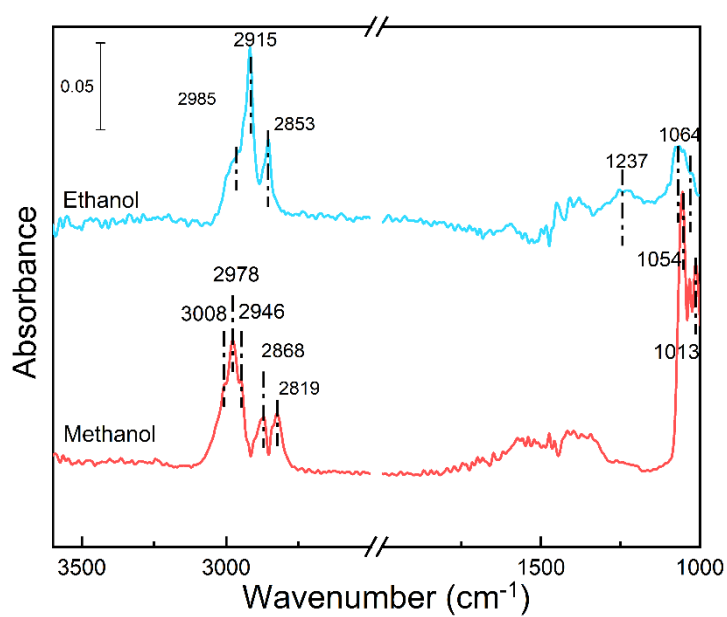

**Figure S14.** *In situ* DRIFTS spectra of methanol and ethanol adsorption on spent KFeCuZn/ZrO<sub>2</sub>.

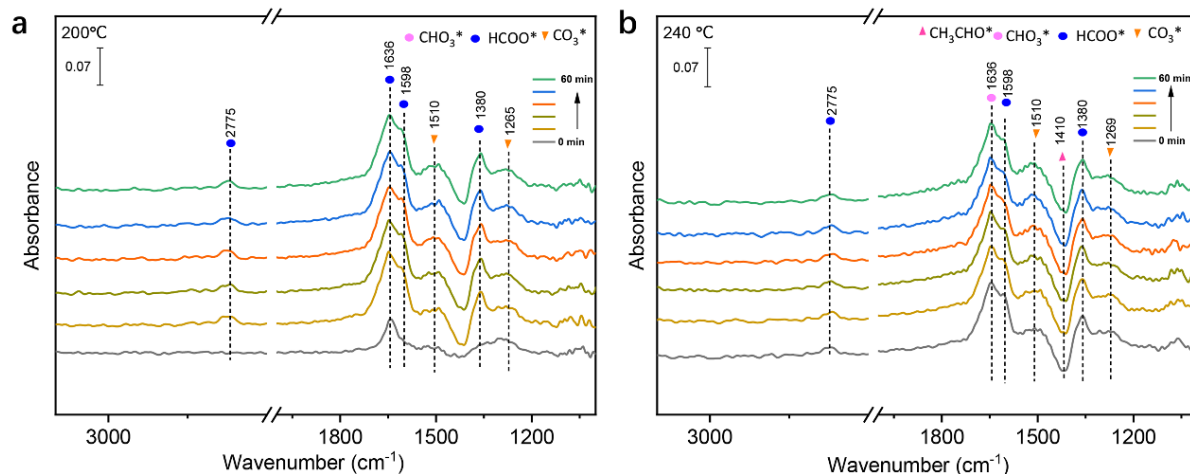

**Figure S15.** *In situ* DRIFTS spectra of the CO<sub>2</sub> + H<sub>2</sub> reaction over the KFeCuZn/ZrO<sub>2</sub> catalyst taken under 0.5 MPa CO<sub>2</sub>/H<sub>2</sub> flow at different reaction temperature (a: 200 °C; b: 240 °C).

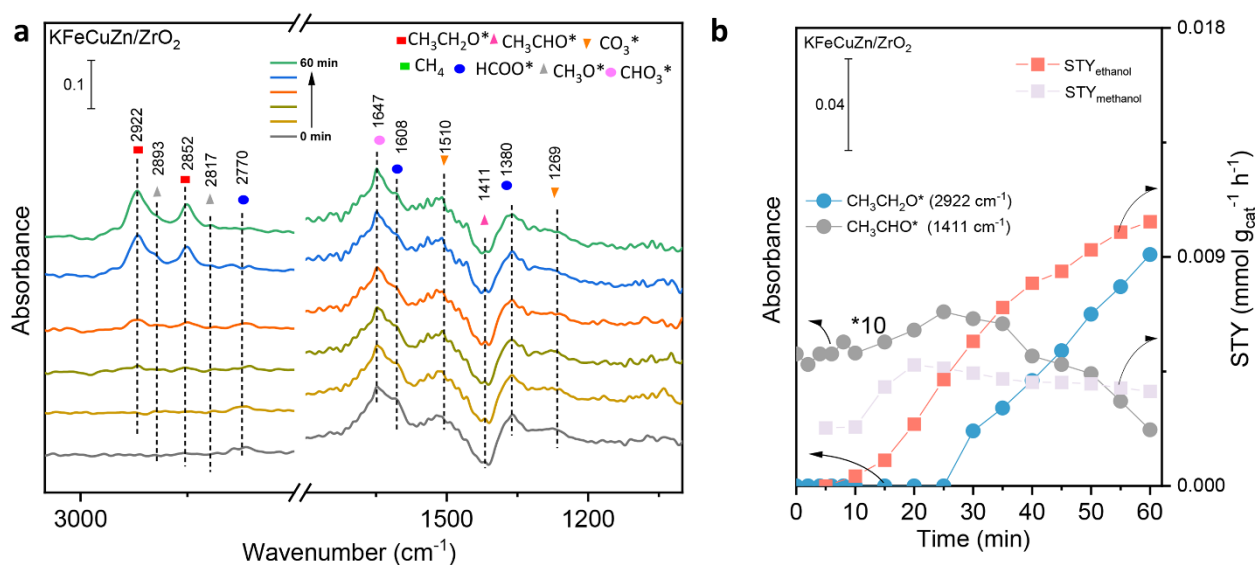

**Figure S16.** *In situ* DRIFTS spectra. (a) The time resolution spectra of the CO<sub>2</sub> + H<sub>2</sub> reaction over the KFeCuZn/ZrO<sub>2</sub> at 280 °C; (b) Dynamic IR peak intensities of CH<sub>3</sub>CHO\* (1411 cm<sup>-1</sup>) and CH<sub>3</sub>CH<sub>2</sub>O\* (2922 cm<sup>-1</sup>) and some of products (ethanol and methanol) amount from micro-GC at 280 °C.

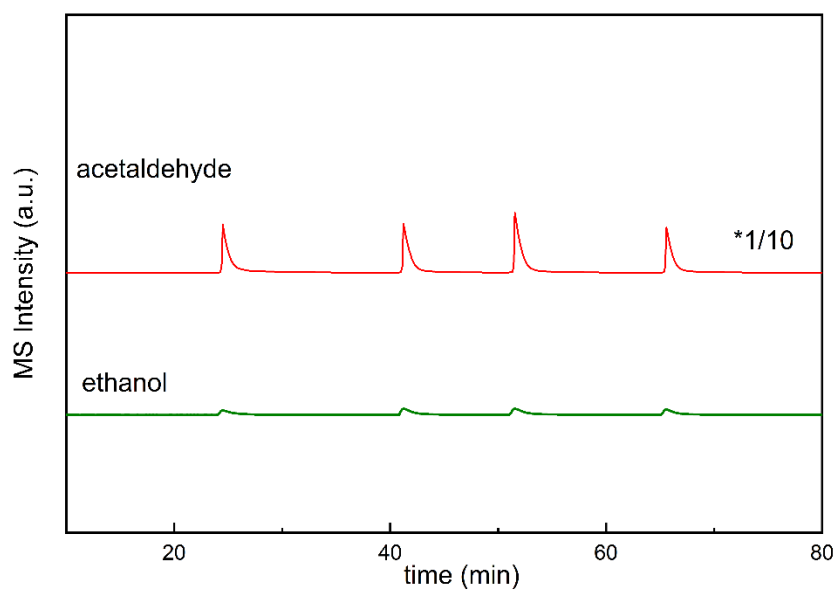

**Figure S17.** Pulse experiment over the spent KFeCuZn/ZrO<sub>2</sub> catalyst taken under 0.1 MPa CO<sub>2</sub>/H<sub>2</sub> flow at 320 °C.

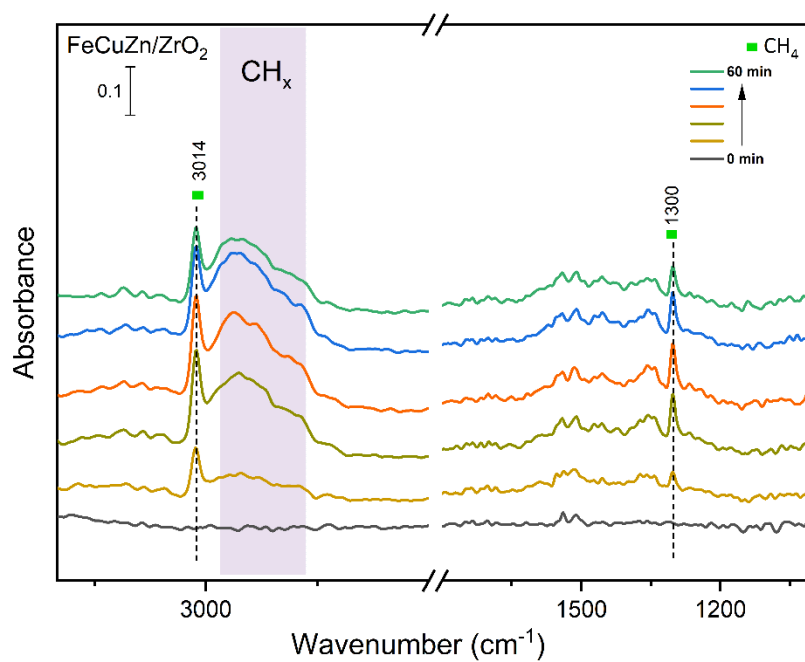

**Figure S18.** *In situ* DRIFTS spectra of the CO<sub>2</sub> + H<sub>2</sub> reaction over the FeCuZn/ZrO<sub>2</sub> catalyst taken under 0.5 MPa CO<sub>2</sub>/H<sub>2</sub> flow at 320 °C.

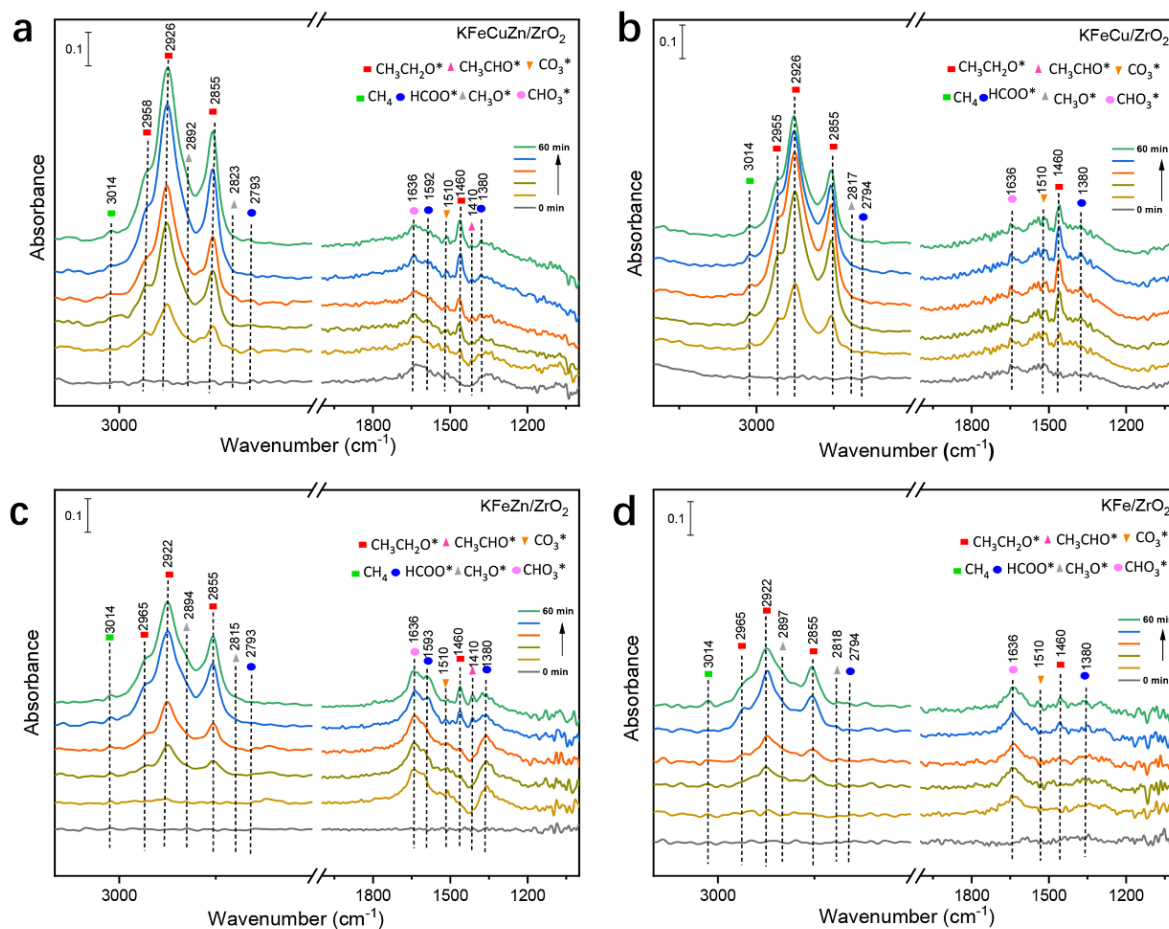

**Figure S19.** *In situ* DRIFTS spectra of the  $\text{CO}_2 + \text{H}_2$  reaction over the  $\text{KFeCuZn/ZrO}_2$  (a),  $\text{KFeCu/ZrO}_2$  (b),  $\text{KFeZn/ZrO}_2$  (c), and  $\text{KFe/ZrO}_2$  (d), catalyst taken under 0.5 MPa  $\text{CO}_2/\text{H}_2$  flow at 320 °C.

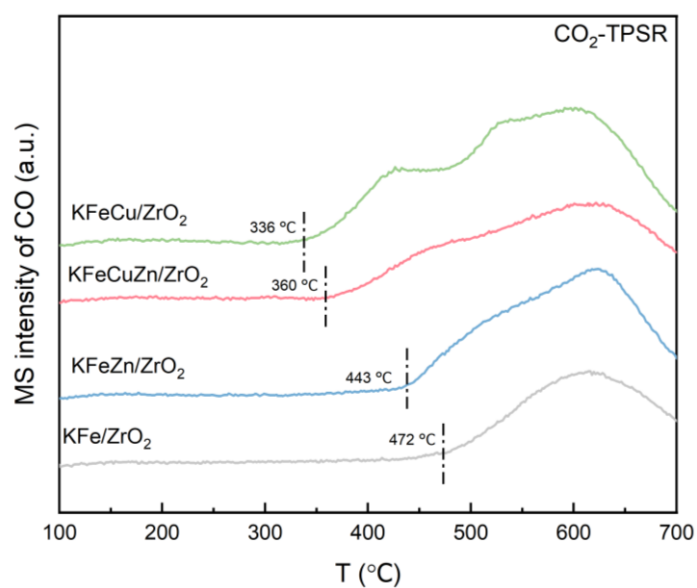

**Figure S20.** MS signals of  $m/z=28$  in  $\text{CO}_2$ -TPSR after  $\text{CO}_2$  pre-adsorbed catalysts under 5% $\text{H}_2/\text{Ar}$  flow, over  $\text{KFeZnCu/ZrO}_2$ ,  $\text{KFeZn/ZrO}_2$ ,  $\text{KFeCu/ZrO}_2$ , and  $\text{KFe/ZrO}_2$ .

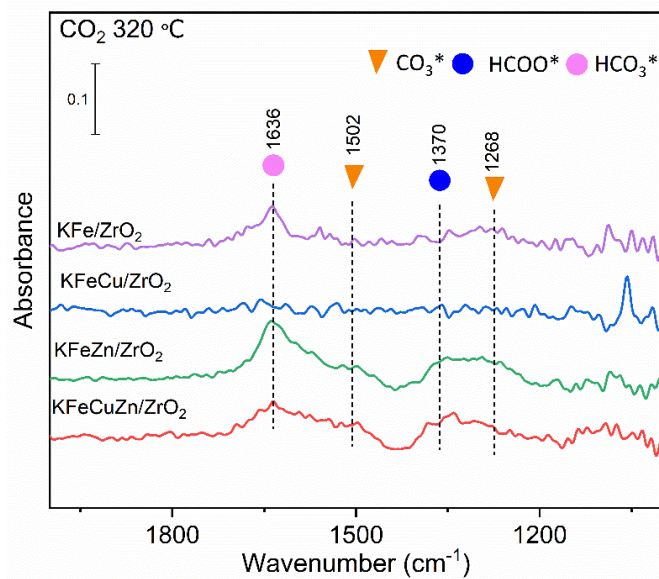

**Figure S21.** *In situ* DRIFTS spectra of the CO<sub>2</sub> adsorption over the different catalysts, taken under 0.5 MPa at 320 °C.

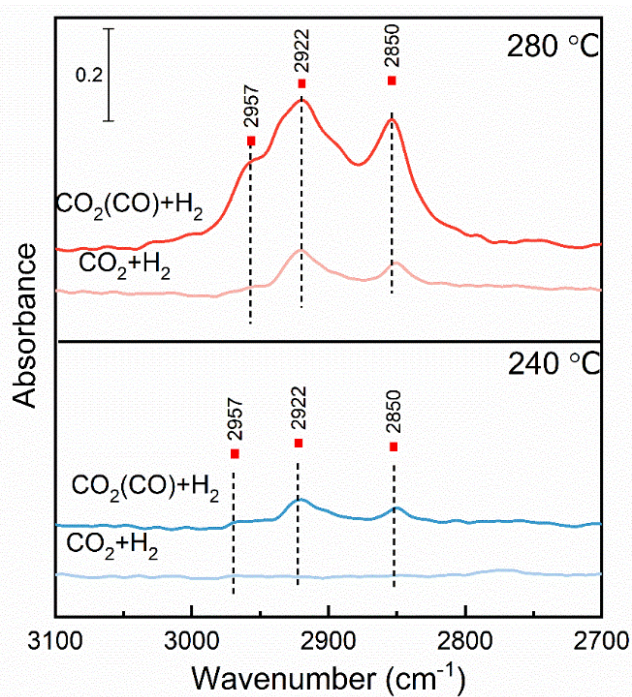

**Figure S22.** *In situ* DRIFTS spectra of the CO<sub>2</sub> + H<sub>2</sub> and CO co-feeding (20%CO in CO<sub>x</sub>) reactions over the KFeCuZn/ZrO<sub>2</sub> catalyst taken under 0.5 MPa at 240 and 280 °C.



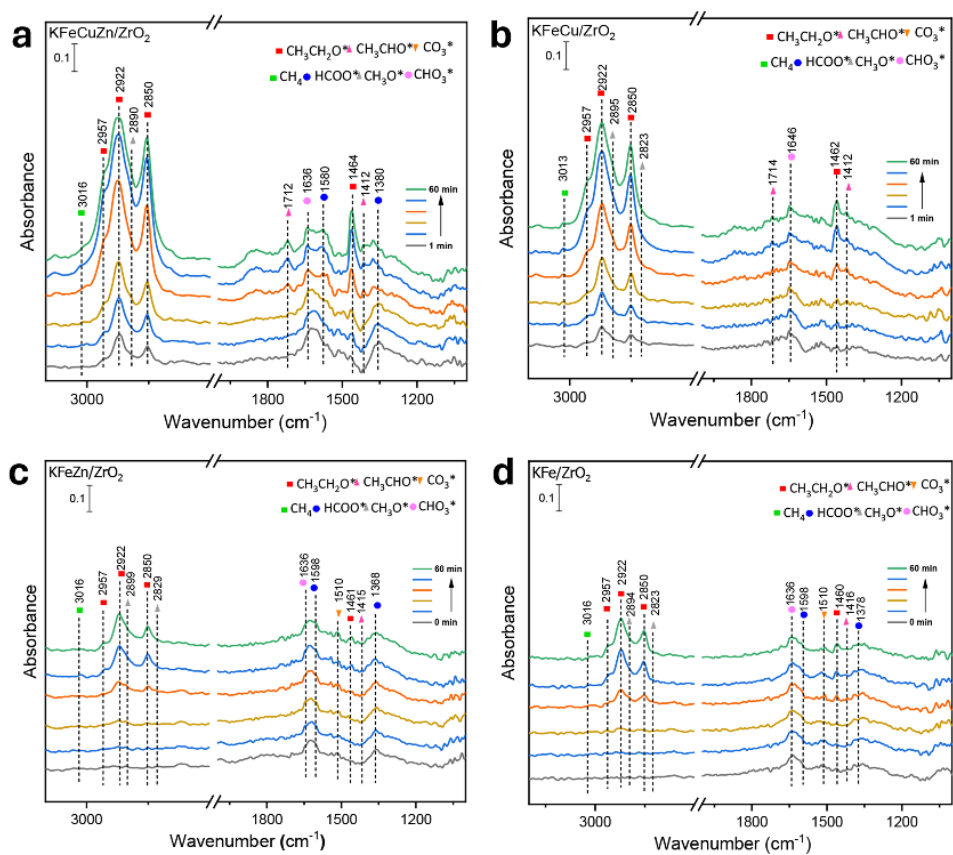

**Figure S23.** *In situ* DRIFTS spectra of the CO + H<sub>2</sub> reaction over the KFeCuZn/ZrO<sub>2</sub> (a), KFeCu/ZrO<sub>2</sub> (b), KFeZn/ZrO<sub>2</sub> (c), and KFe/ZrO<sub>2</sub> (d), catalyst taken under 0.5 MPa at 280 °C.

## Notes and references:

- 1 S. Zhang, Z. Wu, X. Liu, Z. Shao, L. Xia, L. Zhong, H. Wang and Y. Sun, *Appl. Catal., B*, 2021, **293**, 120207.
- 2 D. Xu, M. Ding, X. Hong, G. Liu and S. C. E. Tsang, *ACS Catal*, 2020, **10**, 5250–5260.
- 3 Y. Wang, W. Wang, R. He, M. Li, J. Zhang, F. Cao, J. Liu, S. Lin, X. Gao, G. Yang, M. Wang, T. Xing, T. Liu, Q. Liu, H. Hu, N. Tsubaki and M. Wu, *Angewandte Chemie International Edition*, 2023, **62**, e20231178.
- 4 M. Takagawa, A. Okamoto, H. Fujimura, Y. Izawa and H. Arakawa, *Stud. Surf. Sci. Catal.*, 1998, **114**, 525–528.
- 5 X. Xi, F. Zeng, H. Zhang, X. Wu, J. Ren, T. Bisswanger, C. Stampfer, J. P. Hofmann, R. Palkovits and H. J. Heeres, *ACS Sustain. Chem. Eng.*, 2021, **9**, 6235–6249.
- 6 A. Goryachev, A. Pustovarenko, G. Shterk, N. S. Alhajri, A. Jamal, M. Albuali, L. van Koppen, I. S. Khan, A. Russkikh, A. Ramirez, T. Shoinkhorova, E. J. M. Hensen and J. Gascon, *ChemCatChem*, 2021, **13**, 3324–3332.
- 7 D. Xu, M. Ding, X. Hong and G. Liu, *ACS Catal.*, 2020, **10**, 14516–14526.
- 8 C. Yang, R. Mu, G. Wang, J. Song, H. Tian, Z. J. Zhao and J. Gong, *Chem. Sci.*, 2019, **10**, 3161–3167.
- 9 K. An, S. Zhang, J. Wang, Q. Liu, Z. Zhang and Y. Liu, *J. Energy Chem.*, 2021, **56**, 486–495.
- 10 F. J. Caparrós, L. Soler, M. D. Rossell, I. Angurell, L. Piccolo, O. Rossell and J. Llorca, *ChemCatChem*, 2018, **10**, 2365–2369.
- 11 Y. Lou, F. jiang, W. Zhu, L. Wang, T. Yao, S. Wang, B. Yang, B. Yang, Y. Zhu and X. Liu, *Appl Catal B*, 2021, **291**, 120122.
- 12 F. Zhang, W. Zhou, X. Xiong, Y. Wang, K. Cheng, J. Kang, Q. Zhang and Y. Wang, *J. Phys. Chem. C*, 2021, **125**, 24429–24439.
- 13 Y. Wang, K. Wang, B. Zhang, X. Peng, X. Gao, G. Yang, H. Hu, M. Wu and N. Tsubaki, *ACS Catal.*, 2021, **11**, 11742–11753.
- 14 H. Kusama, K. Okabe, K. Sayama and H. Arakawa, *Catal. Today*, 1996, **28**, 261–266.
- 15 S. Liu, H. Zhou, L. Zhang, Z. Ma and Y. Wang, *Chem. Eng. Technol.* 2, 2019, **42**, 962–970.
- 16 D. Xu, H. Yang, X. Hong, G. Liu and S. C. Edman Tsang, *ACS Catal.*, 2021, **11**, 8978–8984.
- 17 R. Yao, J. Wei, Q. Ge, J. Xu, Y. Han, Q. Ma, H. Xu and J. Sun, *Appl. Catal., B*, 2021, **298**, 120556.
- 18 A. H. M. da Silva, L. H. Vieira, C. S. Santanta, M. T. M. Koper, E. M. Assaf, J. M. Assaf and J. F. Gomes, *Appl. Catal., B*, 2023, **324**, 122221.
- 19 J. Chen, Y. Zha, B. Liu, Y. Li, Y. Xu and X. Liu, *ACS Catal.*, 2023, **13**, 7110–7121.
- 20 S. Zhang, C. Huang, Z. Shao, H. Zhou, J. Chen, L. Li, J. Lu, X. Liu, H. Luo, L. Xia, H. Wang and Y. Sun, *ACS Catal.*, 2023, **13**, 3055–3065.
- 21 Y. Wang, Y. Zhou, X. Zhang, M. Wang, T. Liu, J. Wei, G. Zhang, X. Hong and G. Liu, *Appl. Catal., B*, 2024, **345**, 123691.
- 22 S. Li, H. Guo, C. Luo, H. Zhang, L. Xiong, X. Chen and L. Ma, *Catal. Lett.*, 2013, **143**, 345–355.
- 23 C. Yang, S. Liu, Y. Wang, J. Song, G. Wang, S. Wang, Z. Zhao, R. Mu and J. Gong, *Angew. Chem., Int. Ed.*, 2019, **131**, 11364–11369.
- 24 G. Wang, R. Luo, C. Yang, J. Song, C. Xiong, H. Tian, Z. J. Zhao, R. Mu and J. Gong, *Sci. China: Chem.*, 2019, **62**, 1710–1719.
- 25 L. Ding, T. Shi, J. Gu, Y. Cui, Z. Zhang, C. Yang, T. Chen, M. Lin, P. Wang, N. Xue, L. Peng, X. Guo, Y. Zhu, Z. Chen and W. Ding, *Chem*, 2020, **6**, 2673–2689.

- 26 M. K. Gnanamani, H. H. Hamdeh, G. Jacobs, W. D. Shafer, S. D. Hopps, G. A. Thomas and B. H. Davis, *ChemCatChem*, 2017, **9**, 1303–1312.
- 27 H. Guo, S. Li, F. Peng, H. Zhang, L. Xiong, C. Huang, C. Wang and X. Chen, *Chem. Lett.*, 2015, **145**, 620–630.
- 28 D. L. S. Nieskens, D. Ferrari, Y. Liu and R. Kolonko, *Catal. Commun.*, 2011, **14**, 111–113.
- 29 M. Irshad, H. J. Chun, M. K. Khan, H. Jo, S. K. Kim and J. Kim, *Appl. Catal., B*, 2024, **340**, 123201.
- 30 Q. Zhang, S. Wang, X. Shi, M. Dong, J. Chen, J. Zhang, J. Wang and W. Fan, *Appl. Catal., B*, 2024, **346**, 123748.
- 31 M. R. Gogate and R. J. Davis, *Catal. Commun.*, 2010, **11**, 901–906.
- 32 H. Kusama, K. Okabe, K. Sayama and H. Arakawa, *energy*, 1997, **22**, 343–348.
- 33 M. Kishida, K. Yamada, H. Nagata and K. Wakabayashi, *Chem. Lett.*, 1994, 555–556.
- 34 H. Kusama, K. Okabe, K. Sayama and H. Arakawa, *J. Jpn. Pet. Inst.*, 1999, **42**, 178–179.
- 35 K. Kitamura Bando, K. Soga, K. Kunimori and H. Arakawa, *Appl. Catal., A*, 1998, **175**, 67–81.
- 36 A. Calafat, F. Âtima Vivas, J. Ân, L. Brito, C. San, E. T. Âbal and V. Âchira, *Appl. Catal., A*, 1998, **172**, 217–224.
- 37 W. Xu, P. J. Ramirez, D. Stacchiola and J. A. Rodriguez, *Chem. Lett.*, 2014, **144**, 1418–1424.
- 38 B. Ouyang, S. Xiong, Y. Zhang, B. Liu and J. Li, *Appl. Catal., A*, 2017, **543**, 189–195.
- 39 D. Goud, S. R. Churipard, D. Bagchi, A. K. Singh, M. Riyaz, C. P. Vinod and S. C. Peter, *ACS Catal.*, 2022, **12**, 11118–11128.
- 40 Y. Wang, D. Xu, X. Zhang, X. Hong and G. Liu, *Catal. Sci. Technol.*, 2022, **12**, 1539–1550.
- 41 N. H. M. Dostagir, R. Rattanawan, M. Gao, J. Ota, J. Y. Hasegawa, K. Asakura, A. Fukouka and A. Shrotri, *ACS Catal.*, 2021, **11**, 9450–9461.
- 42 X. Chang, X. Han, Y. Pan, Z. Hao, J. Chen, M. Li, J. Lv and X. Ma, *Ind. Eng. Chem. Res.*, 2022, **61**, 6872–6883.
- 43 I. Ro, Y. Liu, M. R. Ball, D. H. K. Jackson, J. P. Chada, C. Sener, T. F. Kuech, R. J. Madon, G. W. Huber and J. A. Dumesic, *ACS Catal.*, 2016, **6**, 7040–7050.
- 44 T. Liu, D. Xu, M. Song, X. Hong and G. Liu, *ACS Catal.*, 2023, **13**, 4667–4674.
